# Supplementary material
Source: PubMed Central journal article supplement (PMC3553704)
Supplement: AAC.01022-12_zac999101598so1.pdf [file AAC.01022-12_zac999101598so1.pdf]

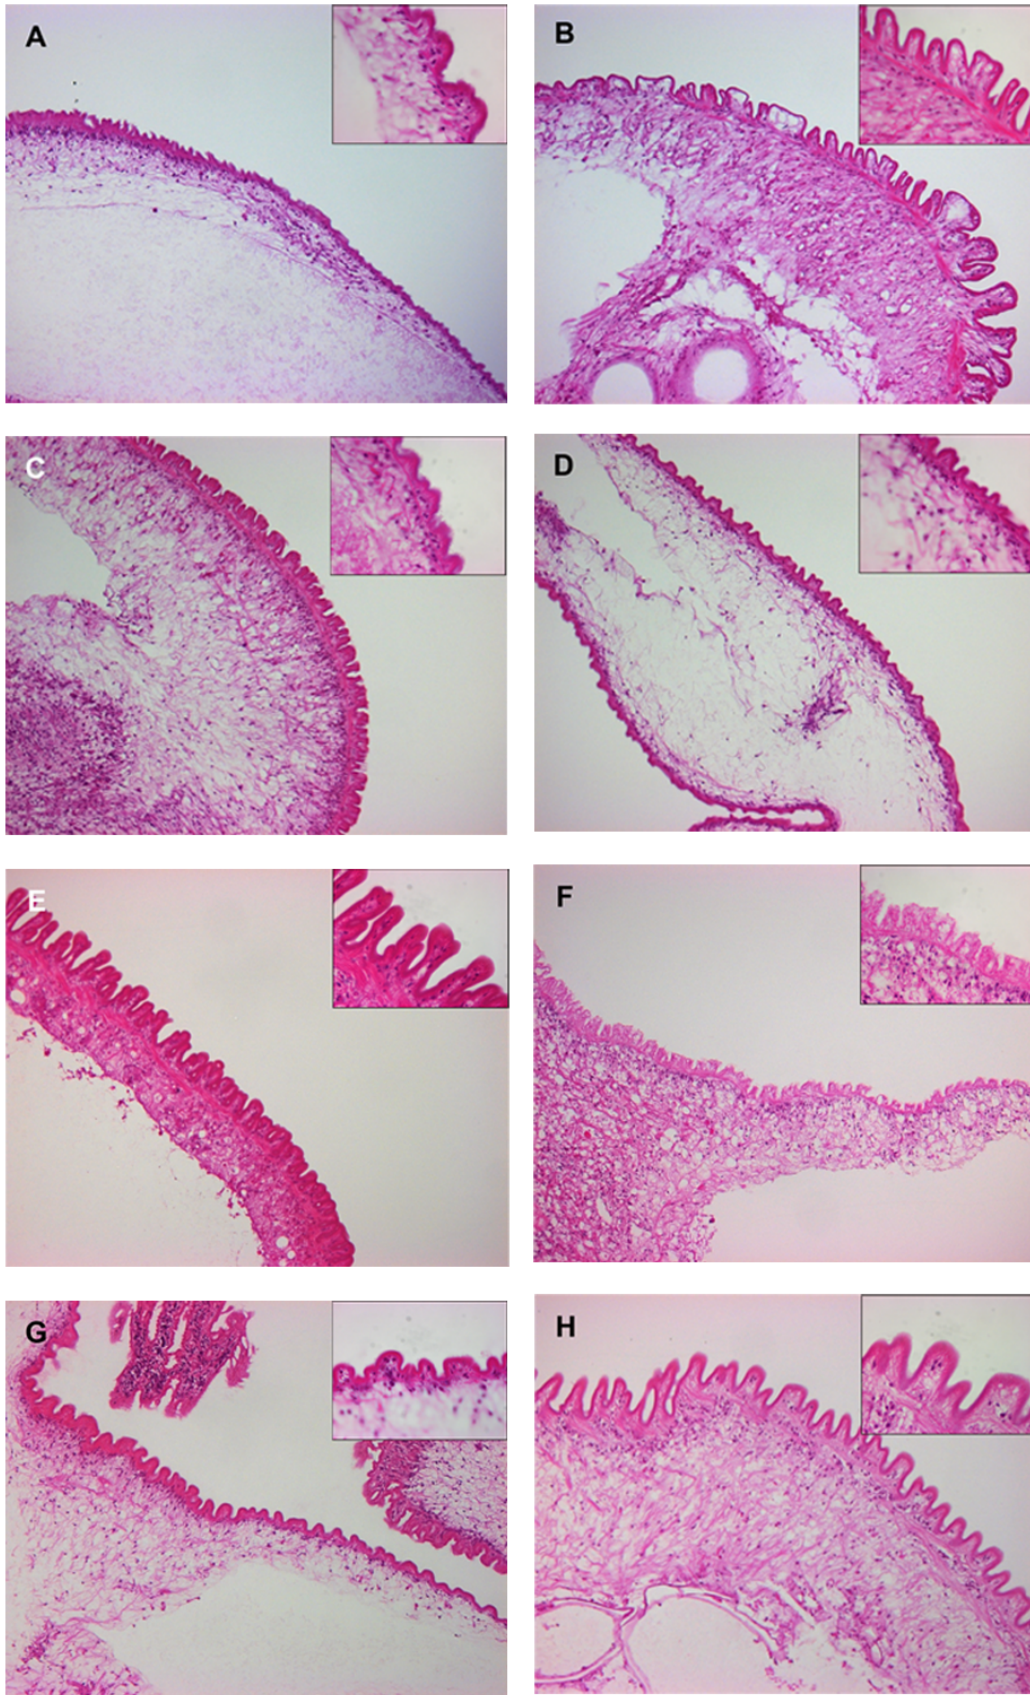

**Supp. Figure 1**

**Supplementary Figure 1:** Morphological changes in drug-treated *T. crassiceps*. Photomicrographs of haematoxyline-eosinstained *T. crassiceps* metacestodes after three days of culture in Medium alone (A), praziquantel (32 nM; B), Nitazoxanide (65 mM; C), artemesinin (35 uM; D), artesunate (260 nM; E), imatinib (100 uM; F), albendazole sulfoxide (ABZSO, 89 uM; G) and serum-free medium (H). Main panels are at 40x magnification, and insets show 100x magnification of the same parasite to reveal details of morphological alterations. Changes, indicating damage to the tegument and subtegumentary layers of the cyst walls are apparent in parasites treated with praziquantel (B), Nitazoxanide (C), and imatinib (F). Drug treatment related changes include loss and distortion of villous structures, loss of microtriches and vacuolation of subtegumentary layers. The mainpanels are at 20x magnification, and the insets, showing details of the tegument and surface, are at 100x magnification.
